# Supplementary material for: Physiology of Schizophrenia, Bipolar Disorder, and Schizoaffective Disorder
Source: Atypon-hosted journal article supplement (doi:10.1176/appi.ajp.2007.06010017), 2007-12-01
Supplement: ajp_164_12_1900_01.pdf [file ajp_164_12_1900_01.pdf]

Suppression of the P50 auditory evoked response is the intact ability to appropriately filter out non-novel stimuli. This process is important for the completion of day-to-day tasks without distraction, as well as for the identification of novel stimuli. Patients with schizophrenia exhibit poor P50 suppression (1, 2). In persons with bipolar disorder, poor P50 suppression has been associated with severity of clinical symptoms (3) and elevated catecholamine levels (4, 5). This deficit has also been observed in subjects with bipolar disorder and a history of psychosis, as well as in subjects with schizoaffective disorder, bipolar type, regardless of current clinical symptom state (6).

Smooth pursuit eye movement is used to maintain foveal position on either a moving object or a stationary object when the head is in motion. Smooth pursuit deficits are some of the most replicated and long-standing impairments documented in patients with schizophrenia (7–9). Impairment is present in stable (10) and neuroleptic-free patients (11), and by the first episode of illness (12). The most specific abnormality of smooth pursuit performance in patients with schizophrenia is the loss of the ability to inhibit the intrusion of small anticipatory (or leading) saccades (13, 14). Multiple studies have documented abnormal smooth pursuit performance in persons with bipolar disorder using quantitative global measures such as gain, log signal to noise ratio, or root mean square measurements (11, 15–20). Of the seven negative studies using these quantitative measures, five found nonsignificant impairment of performance in bipolar subjects (12, 21–24). Of the remaining two negative quantitative studies (25, 26), one examined only two individuals with bipolar disorder (25). The frequency of leading saccades during smooth pursuit eye movement has not been previously studied in persons with bipolar disorder.

The antisaccade task measures the ability to inhibit the prepotent urge to look quickly toward a peripheral target. This inhibition is measured by asking the subject to fixate on a central object and, when a peripheral target appears, to look in the opposite direction. The number of times that a person looks toward the target (a prosaccade error) rather than away from the target (an antisaccade) measures the failure to inhibit the prepotent response. Antisaccade task performance is impaired in persons with schizophrenia (27). Prosaccade errors are present early in the course of illness (28), during remission (29), and in neuroleptic-free patients (30). In persons with bipolar disorder, no impairment (31), nonsignificant impairment (30), and significant impairment (32–35) have been reported.

1. Adler LE, Waldo MC, Freedman R: Neurophysiologic studies of sensory gating in schizophrenia: comparison of auditory and visual responses. *Biol Psychiatry* 1985; 20:1284–1296
2. Louchart-de la Chapelle S, Nkam I, Houy E, Belmont A, Ménard JF, Roussignol AC, Siwek O, Mezerai M, Guillemmou M, Fouldrin G, Levillain D, Dollfus S, Champion D, Thibaut F: A concordance study of three electrophysiological measures in schizophrenia. *Am J Psychiatry* 2005; 162:466–474
3. Franks RD, Adler LE, Waldo MC, Alpert J, Freedman R: Neurophysiological studies of sensory gating in mania: comparison with schizophrenia. *Biol Psychiatry* 1983; 18:989–1005
4. Adler LE, Gerhardt G, Franks R, Baker N, Nagamoto HT, Drebing C, Freedman R: Sensory physiology and catecholamines in schizophrenia and mania. *Psychiatry Res* 1990; 31:297–309
5. Baker NJ, Staunton M, Adler LE, Gerhardt G, Drebing C, Waldo MC, Nagamoto HT, Freedman R: Sensory gating deficits in psychiatric inpatients: relation of catecholamine metabolites in different diagnostic groups. *Biol Psychiatry* 1990; 27:519–528
6. Olincy A, Martin L: Diminished suppression of the P50 auditory evoked potential in bipolar subjects with a history of psychosis. *Am J Psychiatry* 2005; 162:43–49
7. Holzman PS, Proctor LR, Hughes DW: Eye-tracking patterns in schizophrenia. *Science* 1973; 181:179–181
8. Diefendorf AR, Dodge R: An experimental study of the ocular reactions of the insane from photographic records. *Brain* 1908; 31:451–578
9. Levy DL, Holzman PS, Matthysse S, Mendell NR: Eye tracking dysfunction and schizophrenia: a critical perspective. *Schizophr Bull* 1993; 19:461–536
10. Salzman LF, Klein RH, Strauss JS: Pendulum eye-tracking in remitted psychiatric patients. *J Psychiatr Res* 1978; 14:121–126
11. Küfferle B, Friedmann A, Topitz A, Földes P, Anderer P, Kutzer M, Steinberger K: Smooth pursuit eye movements in schizophrenia: influences of neuroleptic treatment and the question of specificity. *Psychopathology* 1990; 23:106–114
12. Gooding DC, Iacono WG, Beiser M: Temporal stability of smooth-pursuit eye tracking in first-episode psychosis. *Psychophysiology* 1994; 31:62–67
13. Ross RG, Olincy A, Mikulich SK, Radant A, Harris JG, Waldo MC, Compagnon N, Heinlein S, Leonard S, Zerbe GO, Adler LE, Freedman R: Admixture analysis of smooth pursuit eye movements in probands with

- schizophrenia and their relatives suggests gain and leading saccades are potential endophenotypes. *Psychophysiology* 2002; 39:809–19
14. Ross RG, Olincy A, Radant A: Amplitude criteria and anticipatory saccades during smooth pursuit eye movements in schizophrenia. *Psychophysiology* 1999; 36:464–468
  15. Kathmann N, Hochrein A, Uwer R, Bondy B: Deficits in gain of smooth pursuit eye movements in schizophrenia and affective disorder patients and their unaffected relatives. *Am J Psychiatry* 2003; 160:696–702
  16. Sweeney JA, Luna B, Haas GL, Keshavan MS, Mann JJ, Thase ME: Pursuit tracking impairments in schizophrenia and mood disorders: step-ramp studies with unmedicated patients. *Biol Psychiatry* 1999; 46:671–680
  17. Lipton RB, Levin S, Holzman PS: Horizontal and vertical pursuit eye movements, the oculocephalic reflex, and the functional psychoses. *Psychiatry Res* 1980; 3:193–203
  18. Levin S, Holzman PS, Rothenberg SJ, Lipton RB: Saccadic eye movements in psychotic patients. *Psychiatry Res* 1981; 5:47–58
  19. Holzman PS, Solomon CM, Levin S, Waternaux CS: Pursuit eye movement dysfunctions in schizophrenia: family evidence for specificity. *Arch Gen Psychiatry* 1984; 41:136–139
  20. Amador XF, Sackeim HA, Mukherjee S, Halperin R, Neeley P, Maclin E, Schnur D: Specificity of smooth pursuit eye movement and visual fixation abnormalities in schizophrenia: comparison to mania and normal controls. *Schizophr Res* 1991; 5:135–144
  21. Abel LA, Friedman L, Jesberger J, Malki A, Meltzer HY: Quantitative assessment of smooth pursuit gain and catch-up saccades in schizophrenia and affective disorders. *Biol Psychiatry* 1991; 29:1063–1072
  22. Muir WJ, St. Clair DM, Blackwood DHR, Roxborough HM, Marshall I: Eye-tracking dysfunction in the affective psychoses and schizophrenia. *Psychol Med* 1992; 22:573–580
  23. Iacono WG, Moreau M, Beiser M, Fleming JAE, Lin TY: Smooth-pursuit eye tracking in first-episode psychotic patients and their relatives. *J Abnorm Psychol* 1992; 101:104–116
  24. Iacono WG, Pelloquin LJ, Lumry AE, Valentine RH, Tuason VB: Eye tracking in patients with unipolar and bipolar affective disorders in remission. *J Abnorm Psychol* 1982; 91:35–44
  25. Friedman L, Jesberger JA, Siever LJ, Thompson P, Mohs R, Meltzer HY: Smooth pursuit performance in patients with affective disorders or schizophrenia and normal controls: analysis with specific oculomotor measures, RMS error and qualitative ratings. *Psychol Med* 1995; 25:387–403
  26. Tien AY, Ross DE, Pearlson GD, Strauss ME: Eye movements and psychopathology in schizophrenia and bipolar disorder. *J Nerv Ment Dis* 1996; 184:331–338
  27. Fukushima J, Fukushima K, Chiba T, Tanaka S, Yamashita I, Kato M: Disturbances of voluntary control of saccadic eye movements in schizophrenic patients. *Biol Psychiatry* 1988; 23:670–677
  28. Hutton SB, Joyce EM, Barnes TRE, Kennard C: Saccadic distractibility in first episode schizophrenia. *Neuropsychol* 2002; 40:1729–1736
  29. Curtis CE, Calkins ME, Grove WM, Feil KJ, Iacono WG: Saccadic disinhibition in patients with acute and remitted schizophrenia and their first-degree biological relatives. *Am J Psychiatry* 2001; 158:100–106
  30. Crawford TJ, Haeger B, Kennard C, Reveley MA, Henderson L: Saccadic abnormalities in psychotic patients, I: neuroleptic-free psychotic patients. *Psychol Med* 1995; 25:461–471
  31. Fukushima J, Morita N, Fukushima K, Chiba T, Tanaka S, Yamashita I: Voluntary control of saccadic eye movements in patients with schizophrenic and affective disorders. *J Psychiatr Res* 1990; 24:9–24
  32. Sereno AB, Holzman PS: Antisaccades and smooth pursuit eye movements in schizophrenia. *Biol Psychiatry* 1995; 37:394–401
  33. Katsanis J, Kortenkamp S, Iacono WG, Grove WM: Antisaccade performance in patients with schizophrenia and affective disorder. *J Abnorm Psychol* 1997; 106:468–472
  34. Curtis CE, Calkins ME, Iacono WG: Saccadic disinhibition in schizophrenia patients and their first-degree biological relatives: a parametric study of the effects of increasing inhibitory load. *Exp Brain Res* 2001; 137:228–236
  35. Gooding DC, Tallent K: The association between antisaccade task and working memory task performance in schizophrenia and bipolar disorder. *J Nerv Ment Dis* 2001; 189:8–16
